# Supplementary material for: The Relationship Between Health-Related Quality of Life and Overall Survival in Patients With Advanced Renal Cell Carcinoma in CheckMate 214
Source: PubMed Central journal article supplement (PMC11144972; doi:10.1093/oncolo/oyae003), 2024-01-27
Supplement: oyae003_suppl_supplementary_figure_s1.pdf [file oyae003_suppl_supplementary_figure_s1.pdf]

Figure S1A

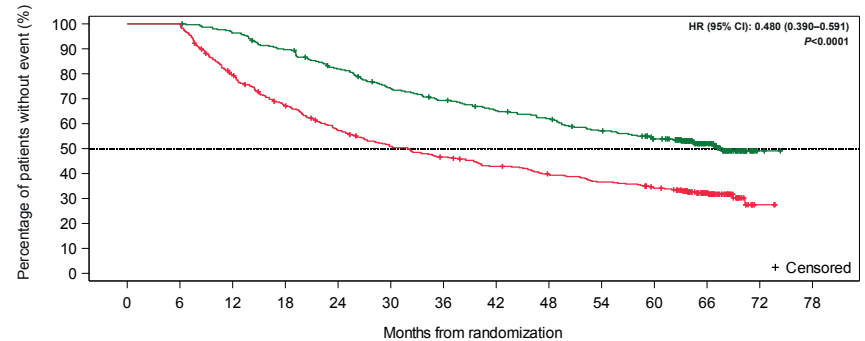

|                                         | Number with events | Number at risk (number censored) |         |         |         |          |          |          |          |          |          |          |         |         |         |  |
|-----------------------------------------|--------------------|----------------------------------|---------|---------|---------|----------|----------|----------|----------|----------|----------|----------|---------|---------|---------|--|
| Patients with stable/improved HRQoL     | 142                | 301 (0)                          | 301 (0) | 289 (1) | 268 (2) | 242 (6)  | 217 (7)  | 202 (8)  | 188 (10) | 178 (11) | 162 (13) | 145 (21) | 67 (95) | 2 (157) | 0 (159) |  |
| Patients with worsened/unobserved HRQoL | 262                | 397 (0)                          | 397 (0) | 312 (5) | 259 (9) | 218 (12) | 192 (14) | 175 (15) | 159 (17) | 145 (19) | 134 (19) | 121 (23) | 65 (73) | 2 (133) | 0 (135) |  |

Figure S1B

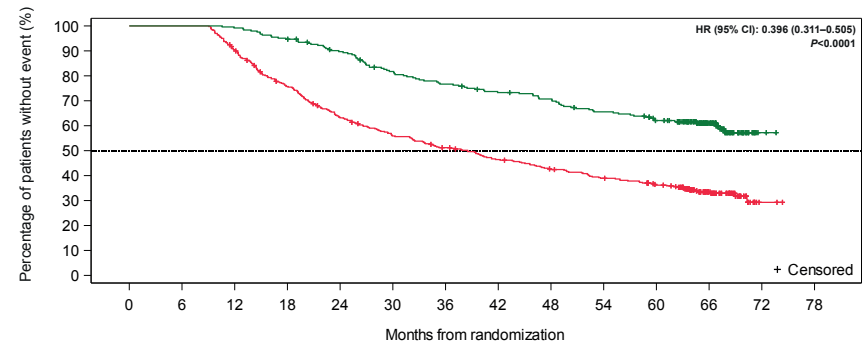

|                                         | Number with events | Number at risk (number censored) |         |         |         |         |          |          |          |          |          |          |         |         |         |  |
|-----------------------------------------|--------------------|----------------------------------|---------|---------|---------|---------|----------|----------|----------|----------|----------|----------|---------|---------|---------|--|
| Patients with stable/improved HRQoL     | 95                 | 244 (0)                          | 244 (0) | 242 (0) | 231 (0) | 215 (4) | 194 (6)  | 182 (6)  | 172 (8)  | 165 (9)  | 152 (10) | 139 (15) | 71 (81) | 2 (147) | 0 (149) |  |
| Patients with worsened/unobserved HRQoL | 258                | 399 (0)                          | 399 (0) | 359 (2) | 296 (7) | 245 (9) | 215 (11) | 195 (13) | 175 (15) | 158 (17) | 144 (18) | 127 (25) | 61 (83) | 2 (139) | 0 (141) |  |

Figure S1C

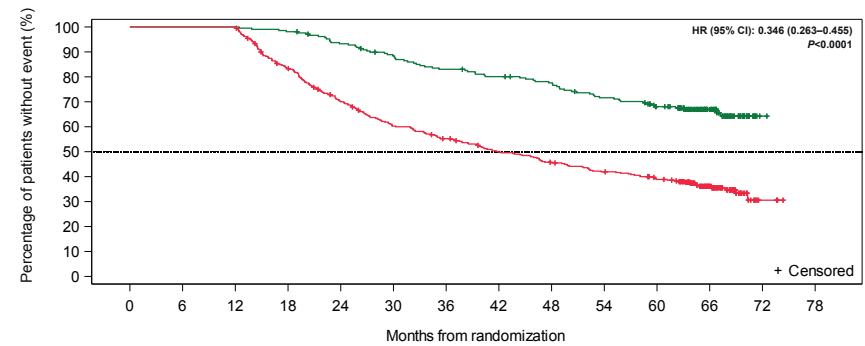

|                                         | Number with events | Number at risk (number censored) |         |         |         |         |          |          |          |          |          |          |         |         |         |  |
|-----------------------------------------|--------------------|----------------------------------|---------|---------|---------|---------|----------|----------|----------|----------|----------|----------|---------|---------|---------|--|
| Patients with stable/improved HRQoL     | 69                 | 209 (0)                          | 209 (0) | 209 (0) | 205 (0) | 193 (2) | 181 (4)  | 170 (4)  | 163 (5)  | 156 (7)  | 143 (8)  | 129 (15) | 67 (75) | 1 (139) | 0 (140) |  |
| Patients with worsened/unobserved HRQoL | 244                | 392 (0)                          | 392 (0) | 392 (0) | 322 (5) | 267 (9) | 228 (11) | 207 (13) | 184 (16) | 167 (17) | 153 (18) | 137 (23) | 65 (87) | 3 (145) | 0 (148) |  |
