# Supplementary material for: The Relationship Between Health-Related Quality of Life and Overall Survival in Patients With Advanced Renal Cell Carcinoma in CheckMate 214
Source: PubMed Central journal article supplement (PMC11144972; doi:10.1093/oncolo/oyae003), 2024-01-27

Figure S2A

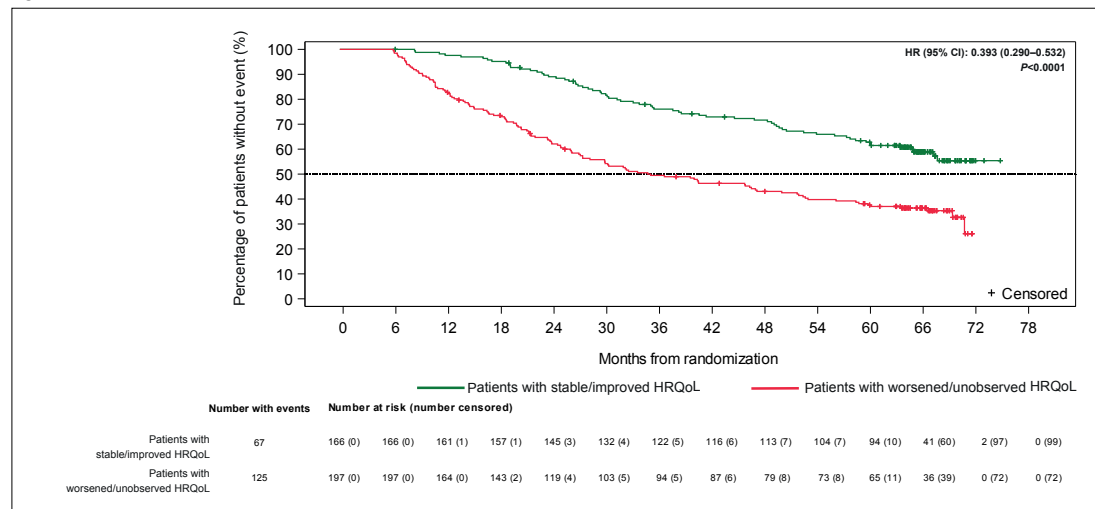

Figure S2B

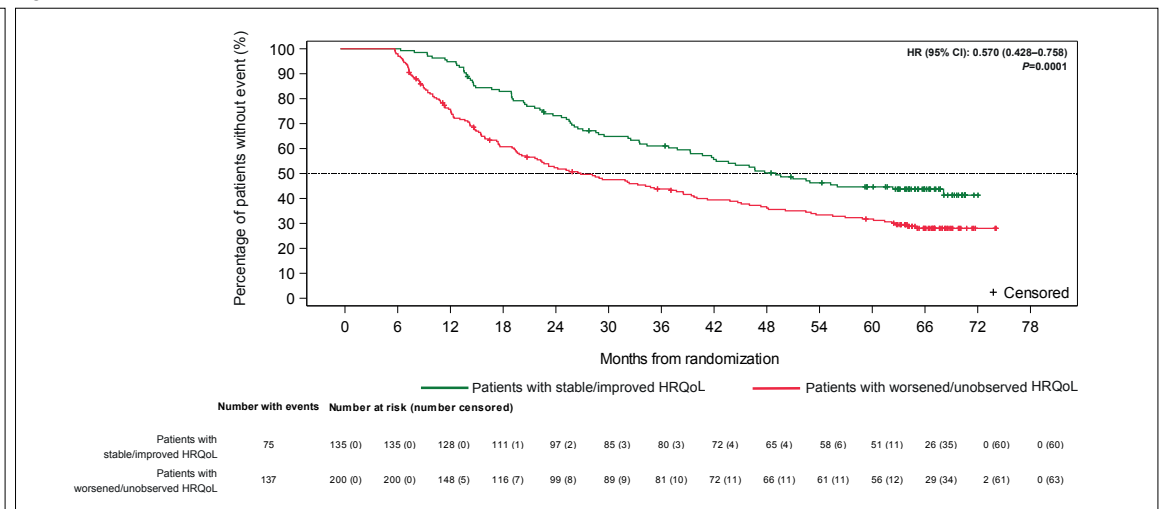

Figure S2C

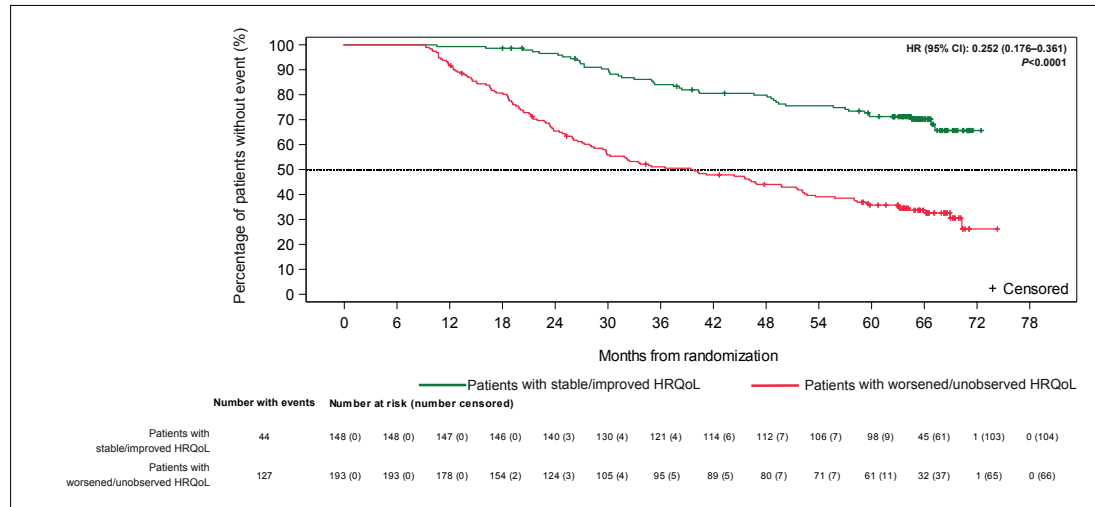

Figure S2D

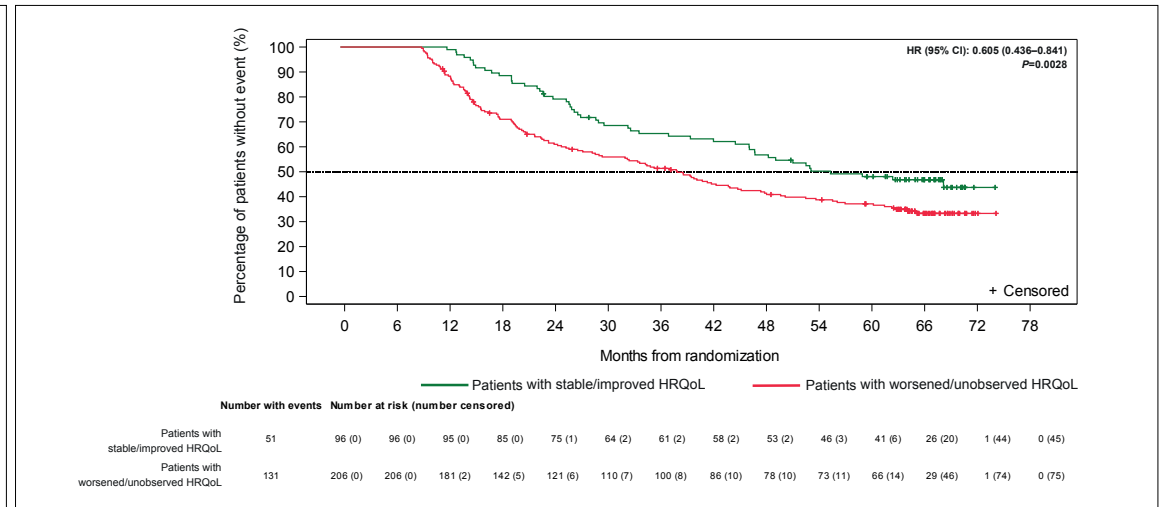

Figure S2E

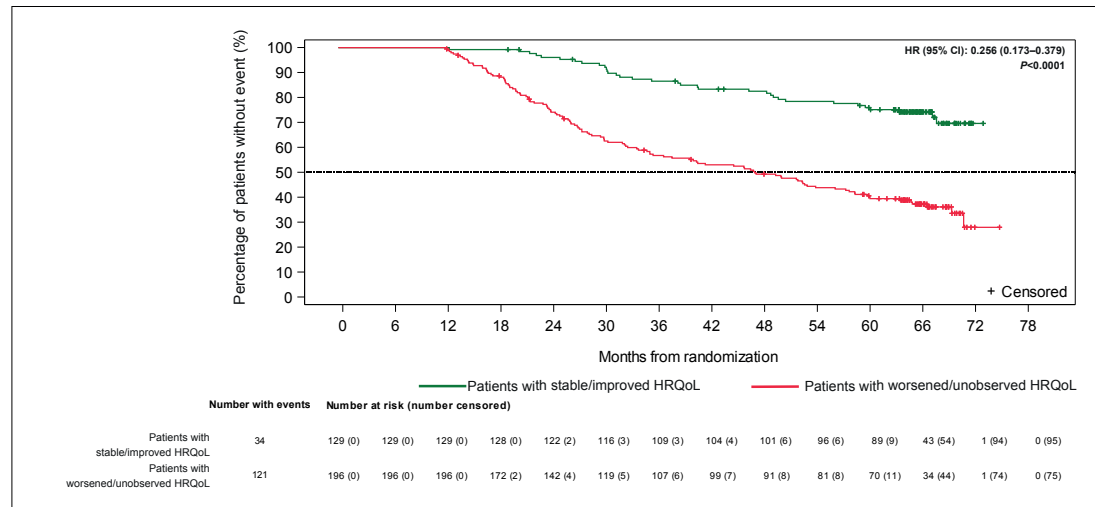

Figure S2F

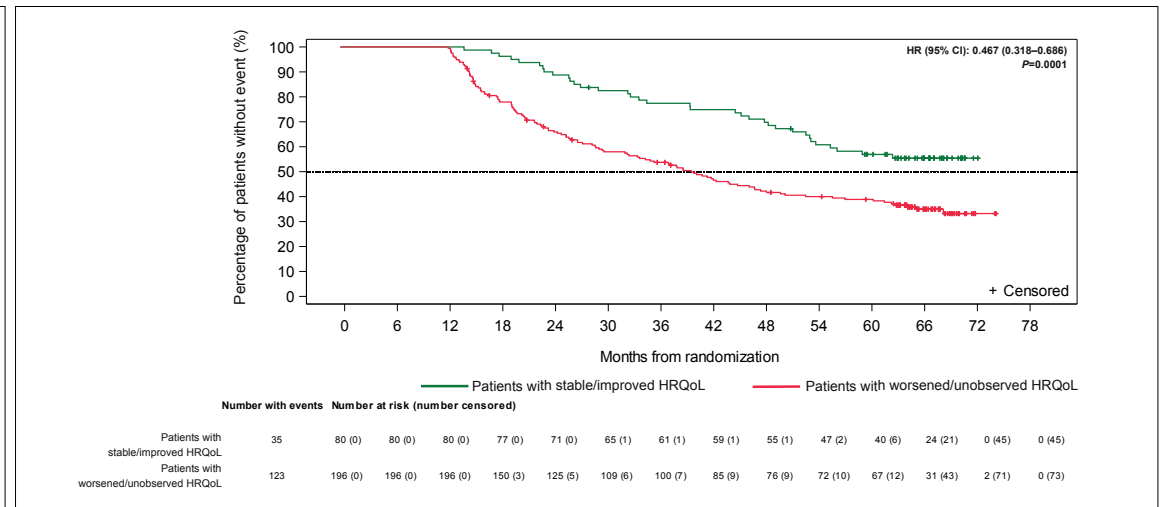

Supplement: oyae003_suppl_supplementary_figure_s2.pdf [file oyae003_suppl_supplementary_figure_s2.pdf]
